# Supplementary material for: Potentially bioavailable iron delivery by iceberg-hosted sediments andatmospheric dust to the polar oceans
Source: Copernicus journal article supplement (doi:10.5194/bg-13-3887-2016), 2016-07-06
Supplement: Supplementary file 1 [file bg-13-3887-2016-supplement.pdf]

Supplement of Biogeosciences, 13, 3887–3900, 2016  
<http://www.biogeosciences.net/13/3887/2016/>  
doi:10.5194/bg-13-3887-2016-supplement  
© Author(s) 2016. CC Attribution 3.0 License.

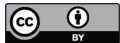

*Supplement of*

## **Potentially bioavailable iron delivery by iceberg-hosted sediments and atmospheric dust to the polar oceans**

**Robert Raiswell et al.**

*Correspondence to:* Robert Raiswell (r.raiswell@see.leeds.ac.uk)

The copyright of individual parts of the supplement might differ from the CC-BY 3.0 licence.

**This file contains Tables S1, S2, S3 and S4.**

Table S1. Iceberg and glacial ice-hosted sediment samples

| <b>Locality (No of Samples)</b>                 | <b>Literature Reference</b>    |
|-------------------------------------------------|--------------------------------|
| <b>Icebergs</b>                                 |                                |
| Narsarsuaq, West Greenland (11)                 | New Data*                      |
| Sermilk, East Greenland (8)                     | New Data*                      |
| Kongsfjorden, Svalbard (14)                     | New Data                       |
| Wallenbergfjorden, Svalbard (8)                 | New Data                       |
| Liefdenfjorden, Svalbard (1)                    | Raiswell et al. (2008a)        |
| Weddell Sea, Antarctica (3)                     | Shaw et al. (2011)             |
| Seymour and King George Islands, Antarctica (6) | Raiswell et al. (2008a)        |
| <b>Glacial Ice</b>                              |                                |
| Mt. Capley, Antarctica (2)                      | New Data                       |
| Charles Peak, Antarctica (2)                    | New Data                       |
| Canada Glacier, Antarctica (1)                  | Raiswell et al. (2008a)        |
| Taylor Glacier, Antarctica (3)                  | Raiswell et al. (2008a)        |
| Russell Glacier, Greenland (3)                  | New Data and Yde et al. (2010) |
| Mittivakkt Glacier, Greenland (1)               | Yde et al. (2010)              |
| Finsterwalderbreen, Svalbard (2)                | New Data                       |
| Engabreen, Norway (2)                           | New Data                       |

Filtered through 2.7 $\mu$ m Whatman 542 filter. \*Filtered through 0.4/0.45 $\mu$ m membrane filters.

Table S2. Atmospheric dust samples

| <b>Locality (No of Samples)</b> | <b>Sample Description or Reference</b>                 |
|---------------------------------|--------------------------------------------------------|
| Crete (1)                       | New Data, dry deposition sampled from a dust collector |

|                                      |                                                                 |
|--------------------------------------|-----------------------------------------------------------------|
| Rosh Pina, Israel (1)                | New Data, dry deposition sampled from clean glass surface       |
| Beijing, China (1)                   | New data, dry deposition from a clean surface (Shi et al. 2012) |
| Rio Gallegos, Southern Patagonia (3) | New data, dry deposition from a clean surface                   |
| Eastern Tropical Atlantic Ocean (6)  | New Data (see Baker et al., 2006)                               |
| Sea of Marmara (1)                   | New Data (see Baker et al., 2006).                              |
| Eastern Med. (2)                     | Raiswell et al. (2008b) and Shi et al. (2012)                   |

Table S3. Fe contents of iceberg-hosted sediments

| <b>ICEBERGS</b>       | <b>% FeA</b> | <b>%FeD</b> |
|-----------------------|--------------|-------------|
| <b>West Greenland</b> |              |             |
| 130717 Iceberg A      | 0.026        | 0.129       |
| 130717 Iceberg A      | 0.032        | 0.190       |
| 130701 Iceberg B3     | 0.051        | 0.537       |
| 130701 Iceberg B2     | 0.058        | 0.227       |
| 130701 Iceberg B1a    | 0.020        | 0.298       |
| 130701 Iceberg B1b    | 0.051        | 0.520       |
| 130701 Iceberg 2      | 0.041        | 0.310       |
| 130701 Iceberg 2      | 0.058        | 0.178       |
| 130701 Iceberg 1Di    | 0.063        | 0.660       |
| 130701 Iceberg 1Di    | 0.038        | 0.435       |
| 130619 Iceberg 1b     | 0.140        | 0.209       |
| <b>East Greenland</b> |              |             |

|                                 |       |       |
|---------------------------------|-------|-------|
| 140727 Iceberg 1a               | 0.037 | 0.330 |
| 140727 Iceberg 1b               | 0.052 | 0.066 |
| 140727 Iceberg 2a               | 0.049 | 0.429 |
| 140727 Iceberg 2b               | 0.026 | 0.350 |
| 140727 Iceberg 2c               | 0.043 | 0.550 |
| 140727 Iceberg 2d               | 0.032 | 0.418 |
| 140727 Iceberg 2e               | 0.010 | 0.190 |
| 140727 Iceberg 3                | 0.025 | 0.208 |
| <b>Antarctica</b>               |       |       |
| Seymour Island S1               | 0.071 | 0.780 |
| Seymour Island S2               | 0.195 | 0.860 |
| Seymour Island S3               | 0.357 | 1.20  |
| Seymour Island S4               | 0.150 | 0.810 |
| King George Island KG1          | 0.057 | 0.310 |
| King George Island KG2          | 0.058 | 0.630 |
| Weddell Sea LMG-05 <sup>3</sup> | 0.046 | 0.426 |
| Weddell Sea NBP-09 IRD1         | 0.165 | 0.625 |
| Weddell Sea NBP-09 IRD4         | 0.496 | 0.089 |
| <b>Svalbard</b>                 |       |       |
| Kongsfjorden 1                  | 0.034 | 0.375 |
| 2                               | 0.016 | 0.930 |
| 3                               | 0.057 | 0.252 |
| 4                               | 0.187 | 0.378 |
| 5                               | 0.037 | 0.252 |
| 6                               | 0.263 | 0.566 |
| 7                               | 0.250 | 0.293 |
| 8                               | 0.073 | 0.208 |
| 9                               | 0.256 | 0.486 |
| K1                              | 0.374 | 0.810 |
| K2                              | 0.094 | 1.185 |
| K3                              | 0.044 | 0.623 |
| K4                              | 0.129 | 0.485 |

|                         |              |              |
|-------------------------|--------------|--------------|
| K5                      | 0.089        | 0.592        |
| Liefdenfjorden          | 0.050        | 0.210        |
| Wallenbergfjorden IMS1  | 0.254        | No data      |
| IMS2                    | 0.289        | No data      |
| IMS3                    | 0.172        | 0.380        |
| IMS3/2                  | 0.236        | No data      |
| IMS4                    | 0.068        | 0.200        |
| IMS5                    | 0.047        | 0.44         |
| IMS6                    | 0.076        | 0.250        |
| IMS7                    | 0.481        | 0.840        |
| <b>Mean<sup>1</sup></b> | <b>0.076</b> | <b>0.377</b> |
| <b>Low<sup>2</sup></b>  | <b>0.030</b> | <b>0.200</b> |
| <b>High<sup>2</sup></b> | <b>0.194</b> | <b>0.715</b> |
| <b>GLACIAL ICE</b>      |              |              |
| <b>Antarctica</b>       |              |              |
| Mt. Capley              | 0.170        | 0.170        |
| Mt. Capley              | 0.090        | 0.170        |
| Charles Peak 6          | 0.030        | 0.460        |
| Charles Peak 7          | 0.010        | 0.060        |
| Taylor T1               | 0.029        | 0.140        |
| Taylor T2               | 0.020        | 0.100        |
| Taylor T3               | 0.029        | 0.100        |
| Canada C1               | 0.023        | 0.027        |
| <b>Greenland</b>        |              |              |
| Russell R0              | 0.032        | 0.000        |
| Mittivakkt              | 0.016        | 0.093        |
| Russell R1              | 0.014        | 0.024        |
| Russell R2              | 0.035        | 0.046        |
| <b>Norway</b>           |              |              |
| Engabreen E1            | 0.026        | 0.050        |
| Engabreen E2            | 0.033        | 0.085        |
| <b>Svalbard</b>         |              |              |
| Finsterwalderbreen F1   | 0.045        | 0.096        |
| Finsterwalderbreen F2   | 0.030        | 0.179        |
| <b>Mean<sup>1</sup></b> | <b>0.030</b> | <b>0.091</b> |

|                         |              |              |
|-------------------------|--------------|--------------|
| <b>Low<sup>2</sup></b>  | <b>0.015</b> | <b>0.042</b> |
| <b>High<sup>2</sup></b> | <b>0.060</b> | <b>0.196</b> |

<sup>1</sup>Logarithmic Mean for FeA and FeD

<sup>2</sup>Low and high values for FeA and FeD derived from the logarithmic standard deviation.

<sup>3</sup>Mean of size fractions 63-125  $\mu\text{m}$  and 125-250 $\mu\text{m}$ .

Table S4. Fe contents of aeolian dust samples

| <b>Sample Location</b>                           | <b>%FeA</b> | <b>%FeD</b> | <b>% FeT</b> | <b>(FeA+FeD)/FeT</b> |
|--------------------------------------------------|-------------|-------------|--------------|----------------------|
| Crete.                                           | 0.009       | 0.71        | No data      | No data              |
| Rosh Pina, Israel.                               | 0.011       | 1.13        | No data      | No data              |
| Eastern Med.                                     | 0.03        | 0.82        | No data      | No data              |
| Eastern Med.                                     | 0.025       | 0.975       | 2.81         | 0.36                 |
| Beijing, China                                   | 0.06        | 0.78        | 3.50         | 0.24                 |
| Atlantic M03<br>18.0°N 20.7°W to 18°N 19°W       | 0.058       | 1.58        | 3.88         | 0.42                 |
| Atlantic M04<br>31.95°N 21.46°W to 30.0°N 20.0°W | 0.106       | 1.46        | 3.01         | 0.52                 |
| Atlantic M01<br>17.1°N 24.8°W to 18.0°N 22.5°W   | 0.033       | 1.58        | 4.15         | 0.41                 |
| Atlantic M05                                     | 0.030       | 1.42        | 4.42         | 0.33                 |

|                                                        |       |        |         |         |
|--------------------------------------------------------|-------|--------|---------|---------|
| 18.0°N 17.5°W to 18.5°N 16.5°W                         |       |        |         |         |
| Atlantic M06<br>18.5°N 16.5°W to 18.8°N 18.0°W         | 0.044 | 1.60   | 4.50    | 0.37    |
| Atlantic M07<br>18.8°N 18.0°W to 19.1°N 16.5°W         | 0.033 | 1.49   | 4.10    | 0.37    |
| Sea of Marmara 18<br>40.66°N 27.46°W to 40.98°N 28.95W | 0.022 | 0.11   | No data | No data |
| Southern Patagonia P1                                  | 0.07  | 0.722  | No data | No data |
| Southern Patagonia P2                                  | 0.086 | 0.520  | No data | No data |
| Southern Patagonia P3                                  | 0.099 | 0.4468 | No data | No data |
| <b>Mean<sup>1</sup></b>                                | 0.038 | 0.868  |         |         |
| <b>Low<sup>2</sup></b>                                 | 0.018 | 0.426  |         |         |
| <b>High<sup>2</sup></b>                                | 0.081 | 1.76   |         |         |

<sup>1</sup>Logarithmic Mean for FeA and FeD,

<sup>2</sup>Low and high values for FeA and FeD derived from the logarithmic standard deviation.

1

2 **References:**

3 Baker, A.R., and P.L. Croot.; Atmospheric and marine controls on aerosol solubility in seawater,  
4 Mar. Chem., 120, 4-13, 2010.

5 Raiswell, R., Benning, L.G., Tranter, M., and Tulaczyk, S.; Bioavailable iron in the Southern  
6 Ocean: The significance of the iceberg conveyor belt, *Geochem. Trans.* 9, 7, doi:10:1186/1467-  
7 4866-9-7, 2008a.

8 Raiswell, R., Benning, L.G., Davidson, L., and Tranter, M.; Nanoparticulate bioavailable iron  
9 minerals in icebergs and glaciers, *Min. Mag.*, 72, 345-348, 2008b.

10 Shaw, T.J., Raiswell, R., Hexel, C.R., Vu, H.P., Moore, W.S., Dudgeon, R., Smith, K.L.; Input,  
11 composition and potential impact of terrigenous material from free-drifting icebergs in the  
12 Weddell Sea, *Deep-Sea Res. II*, 58, 1376-1383, 2011.

13 Shi, Z. Krom, M.D., Jickells, T.D., Bonneville, S., Carslaw, K.S., Mihalopoulos, N., Baker,  
14 A.R., and Benning, L.G.; Impacts on iron solubility in the mineral dust by processes in the source  
15 region and atmosphere: a review, *Aeolian Res*, 5, 21-42, 2012.

16 Yde, K., Finster, K.W., Raiswell, R., Steffansen, J.P., Heinemeier, I., J. Olsen, J., . Gunn-  
17 Laugsson, H.P. and Neilsen, O.B.; Basal ice microbiology at the margin of the Greenland Ice  
18 Sheet, *Ann. Glaciol.*, 51, 71-79, 2010.

19

20

21

22

23

24
